# Supplementary material for: Gut microbiome composition and function in experimental colitis during active disease and treatment-induced remission
Source: PubMed Central journal article supplement — ISME J. 2014 Feb 6;8(7):1403–17. doi: 10.1038/ismej.2014.3 (PMC4069400; doi:10.1038/ismej.2014.3), 2014-02-06

# Figure S4

a

## Differential Clade Responses with Antibiotic Treatment

(Gent vs. Metro vs. Vanco)

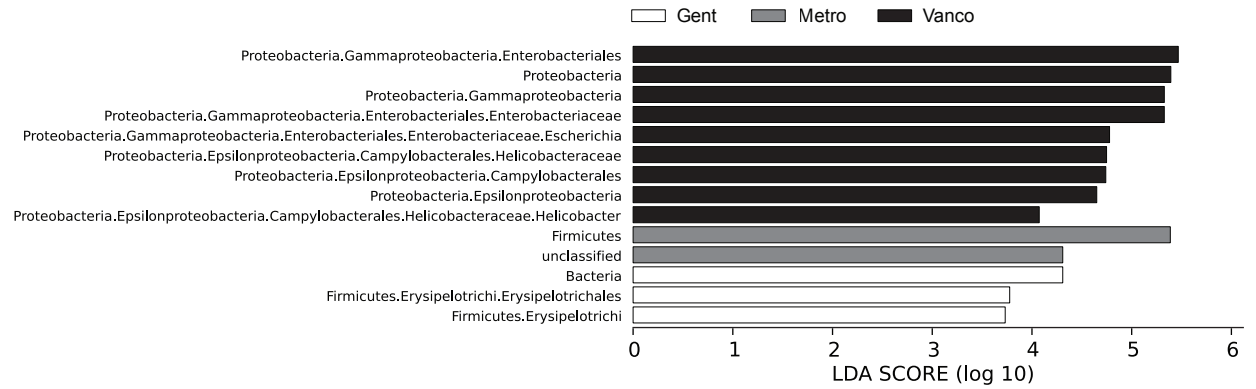

b

## Clade Responses Associated with Active Colitis

(Colitis [Vanco / Sham] vs. Remission [Gent / Metro])

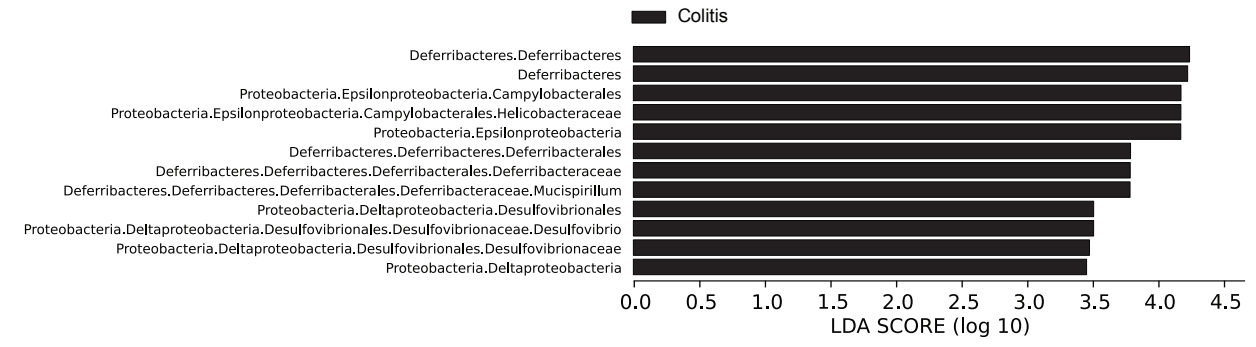

Supplement: ismej20143x7.pdf [file ismej20143x7.pdf]
