# Supplementary material for: Gut microbiome composition and function in experimental colitis during active disease and treatment-induced remission
Source: PubMed Central journal article supplement — ISME J. 2014 Feb 6;8(7):1403–17. doi: 10.1038/ismej.2014.3 (PMC4069400; doi:10.1038/ismej.2014.3), 2014-02-06

Figure S5

a

### Shared Clade Responses

(Immunomodulatories vs. Sham)

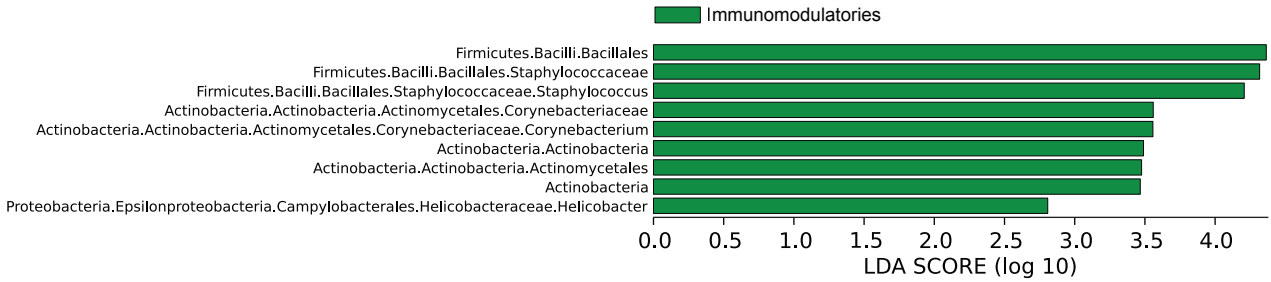

b

### Differential Clade Responses

(anti-TNF- $\alpha$  vs. Tregs)

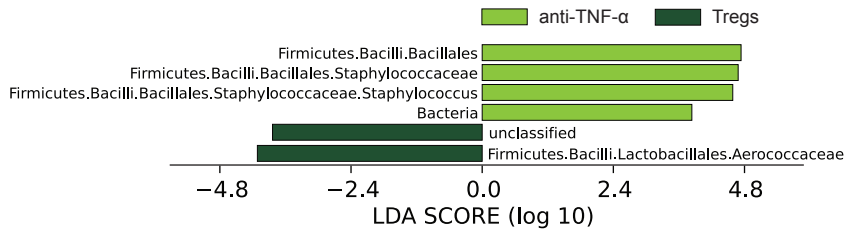

Supplement: ismej20143x8.pdf [file ismej20143x8.pdf]
