# Supplementary figures and images for: Gut microbiome composition and function in experimental colitis during active disease and treatment-induced remission
Source: PubMed Central journal article supplement — ISME J. 2014 Feb 6;8(7):1403–17. doi: 10.1038/ismej.2014.3 (PMC4069400; doi:10.1038/ismej.2014.3), 2014-02-06

Figure S7

Weighted Unifrac Distances

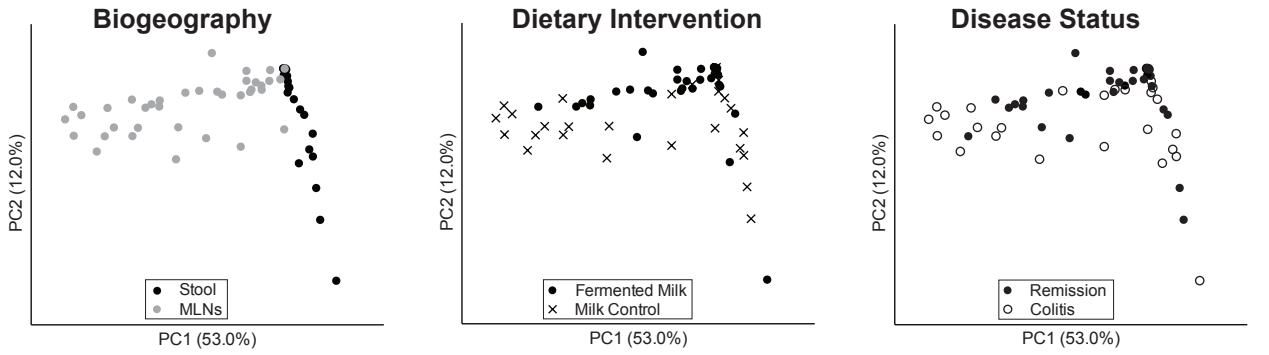

Supplement: ismej20143x10.pdf [file ismej20143x10.pdf]

Figure S8

### Stool vs. MLNs

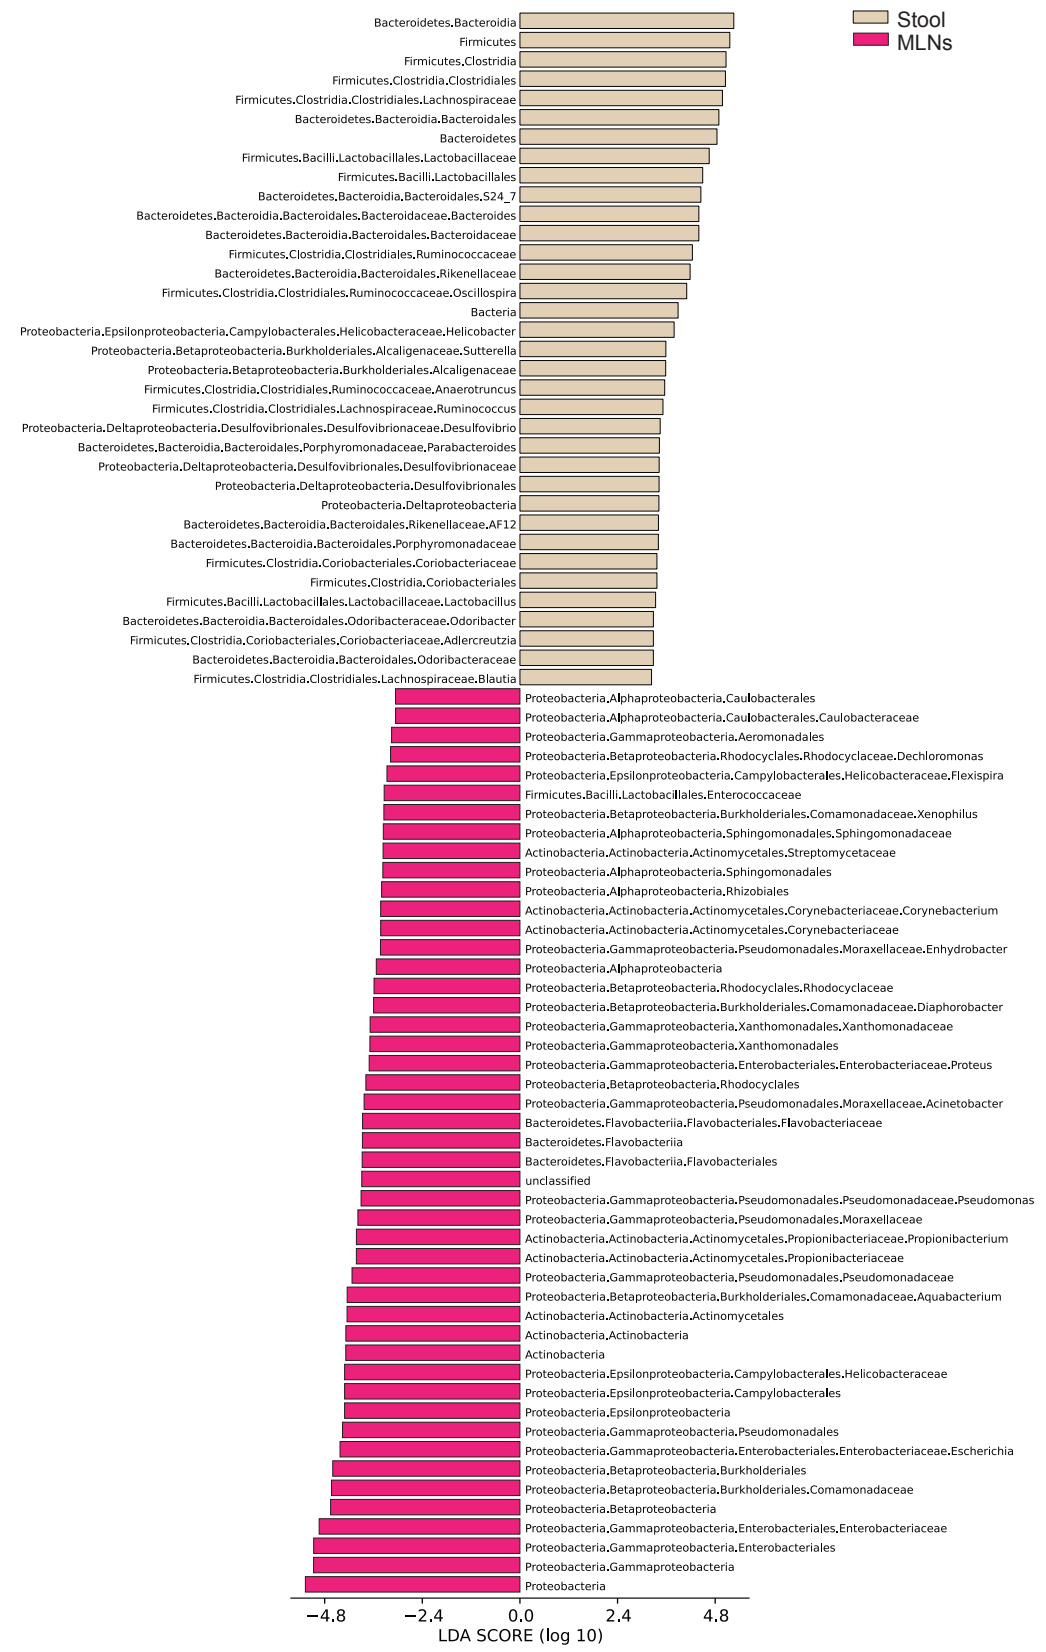

Supplement: ismej20143x11.pdf [file ismej20143x11.pdf]

Figure S9

### Fermented Milk MLNs vs. Milk Control MLNs

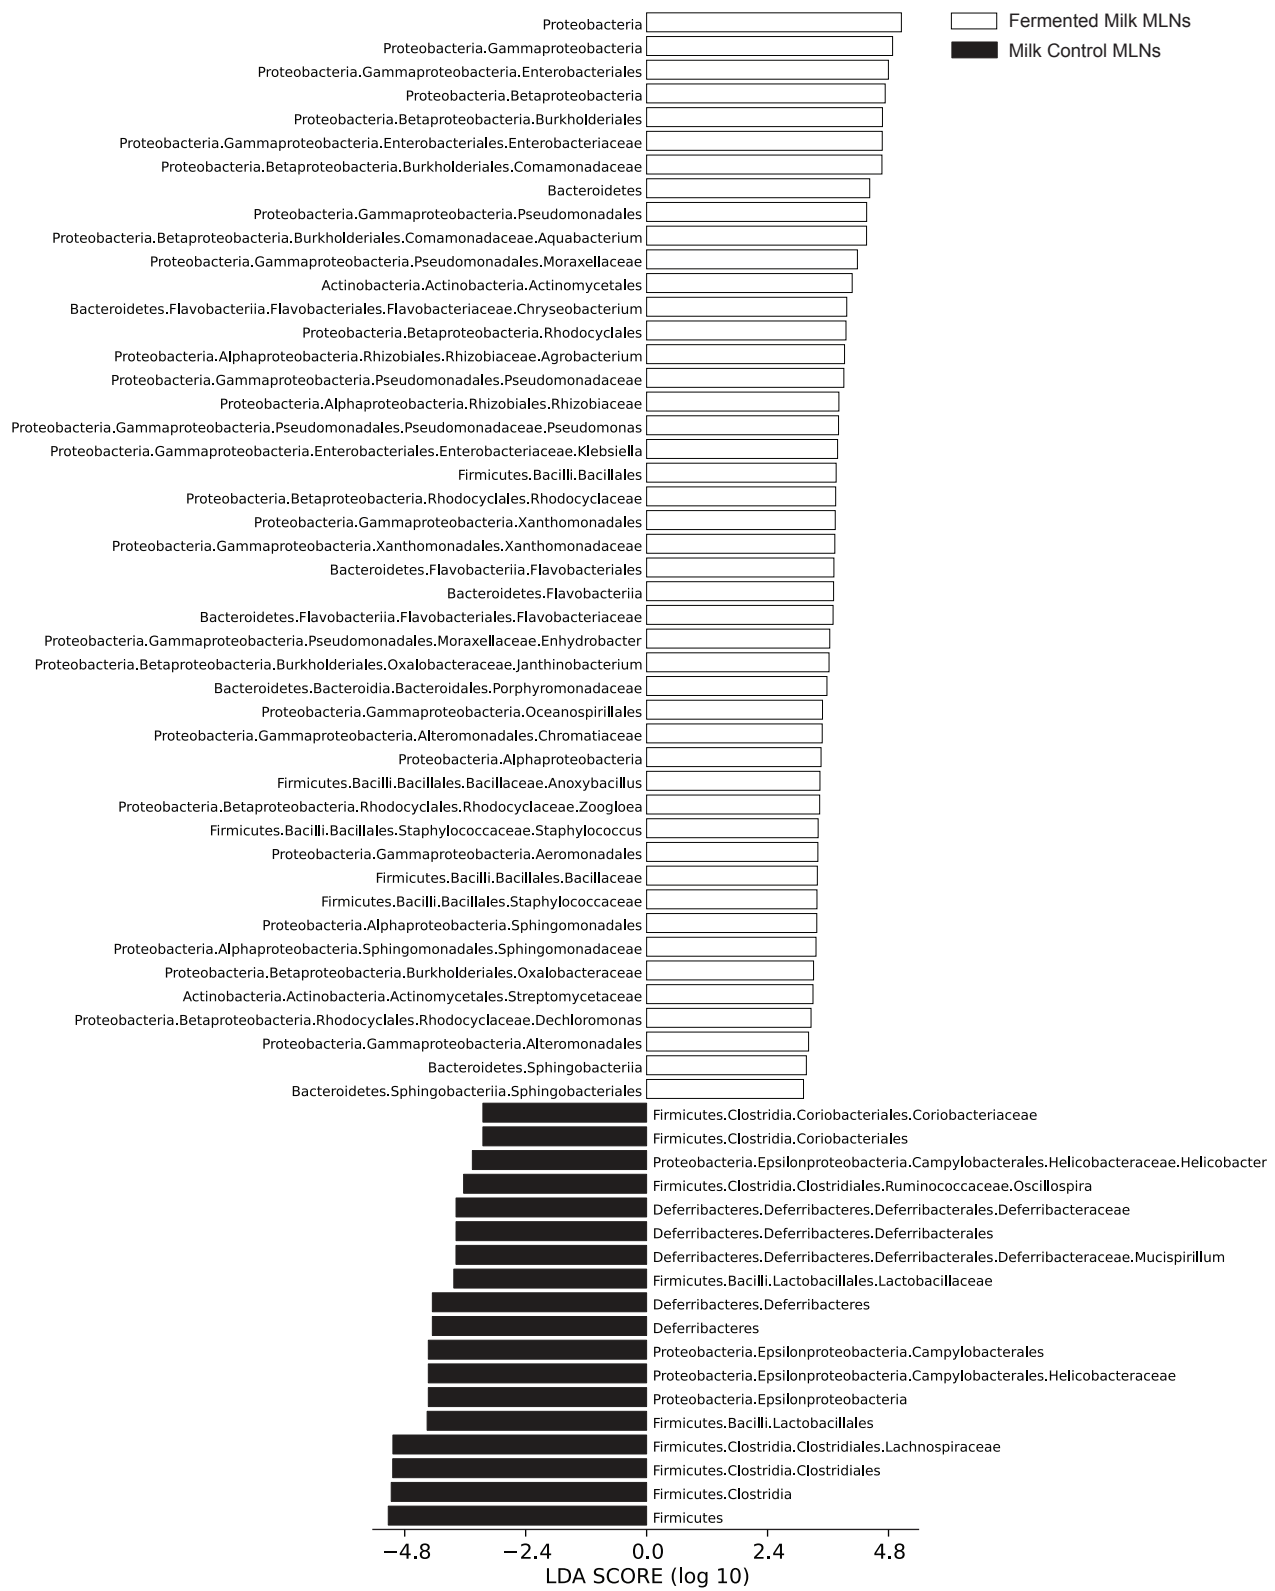

Supplement: ismej20143x12.pdf [file ismej20143x12.pdf]

Figure S10

### Microbial Clades in Active Colitis vs. Remission

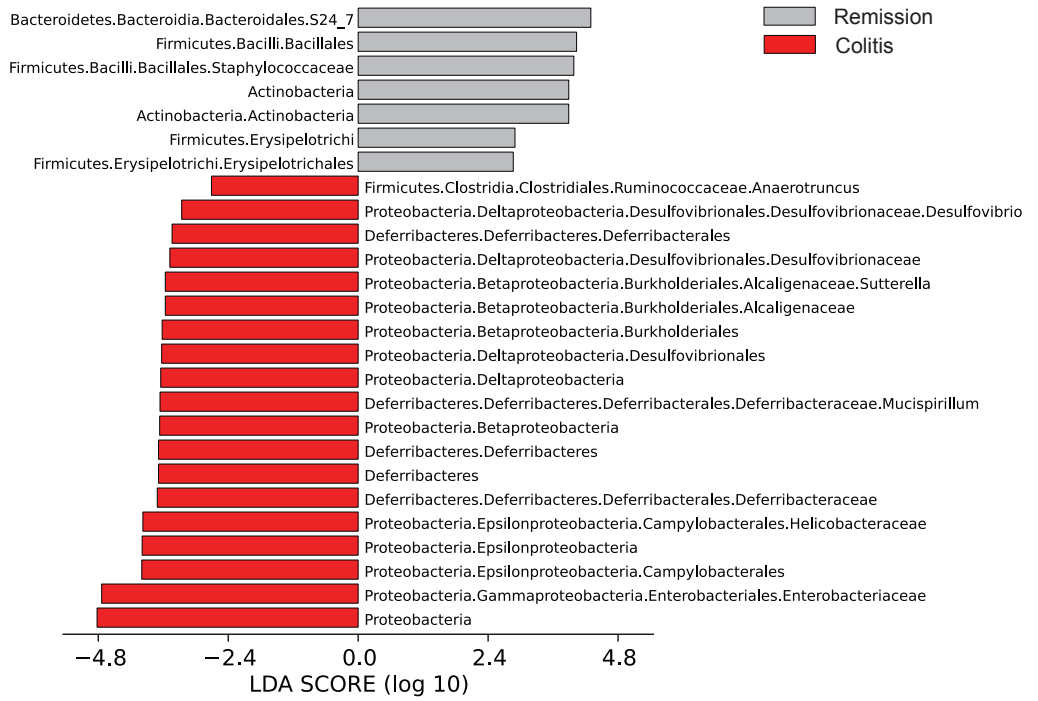

Supplement: ismej20143x13.pdf [file ismej20143x13.pdf]

Figure S11

## Microbial Functions in Active Colitis vs. Remission

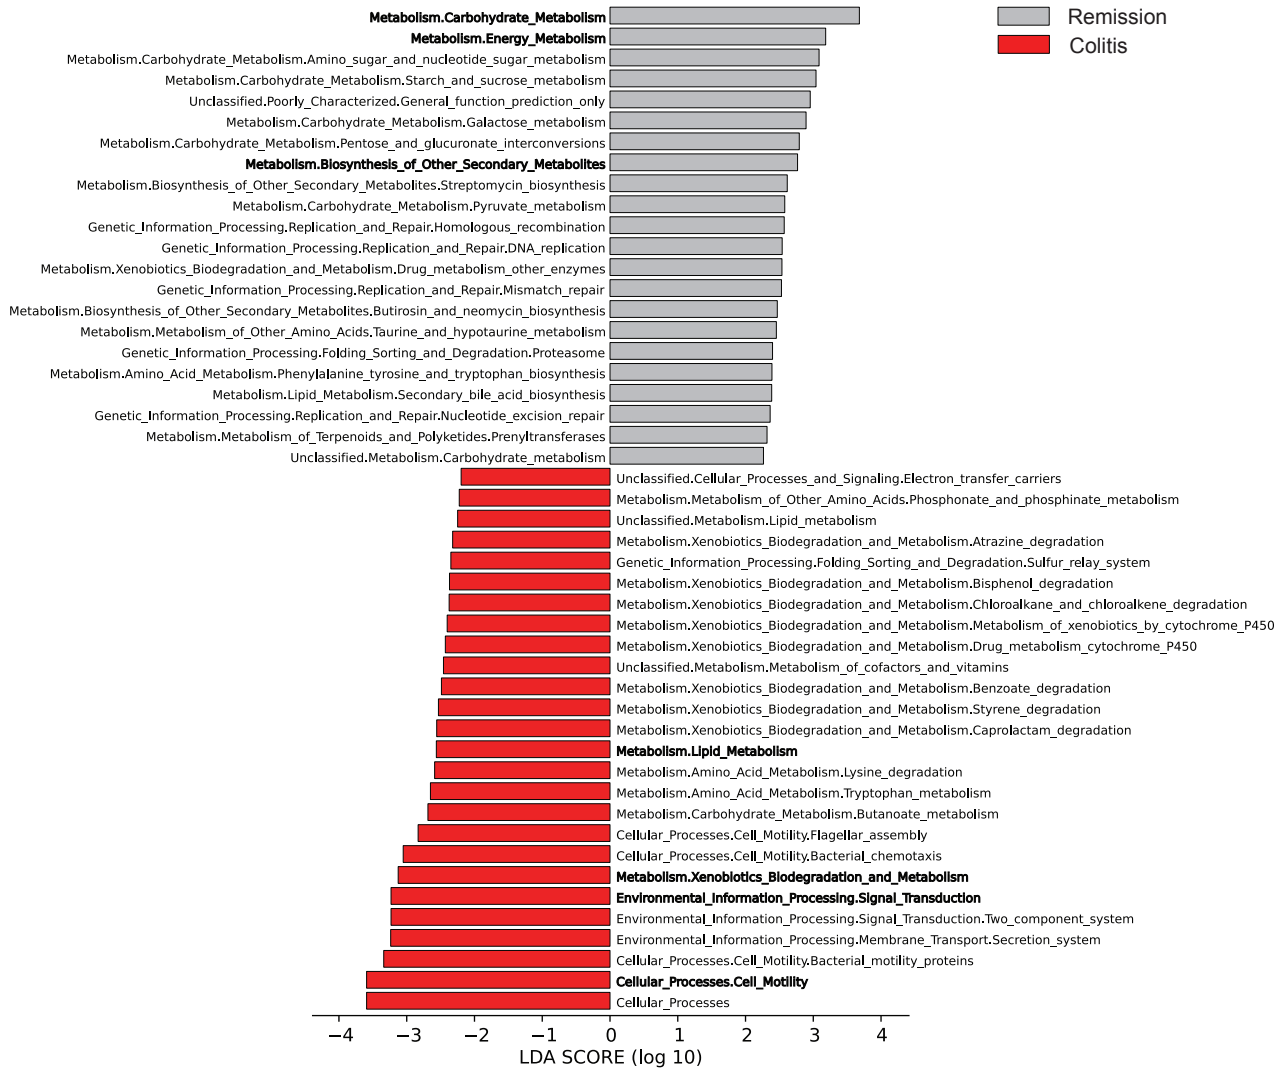

Supplement: ismej20143x14.pdf [file ismej20143x14.pdf]

Figure S1

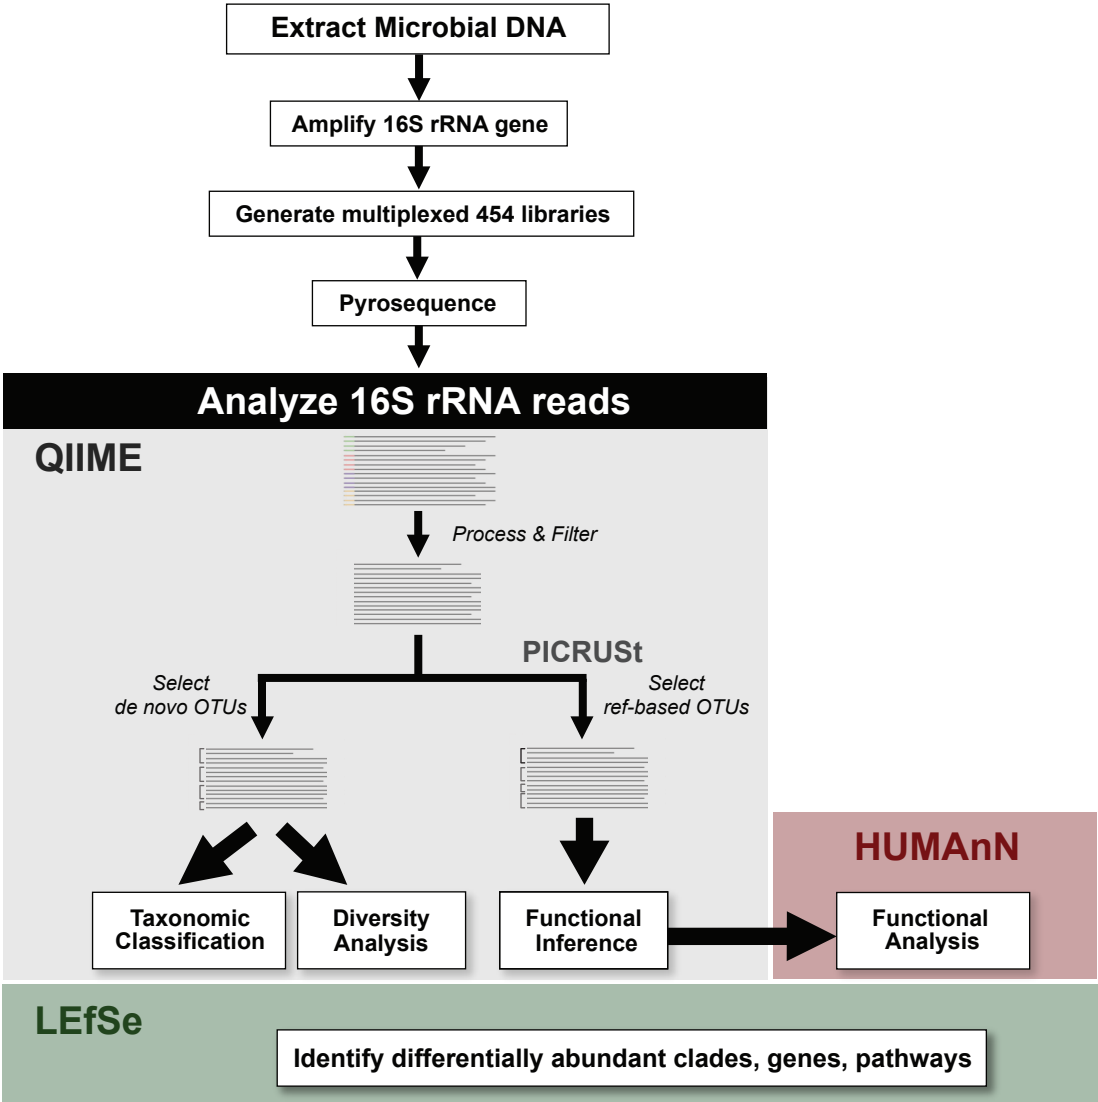

Supplement: ismej20143x4.pdf [file ismej20143x4.pdf]

Figure S2

Weighted Unifrac Distances

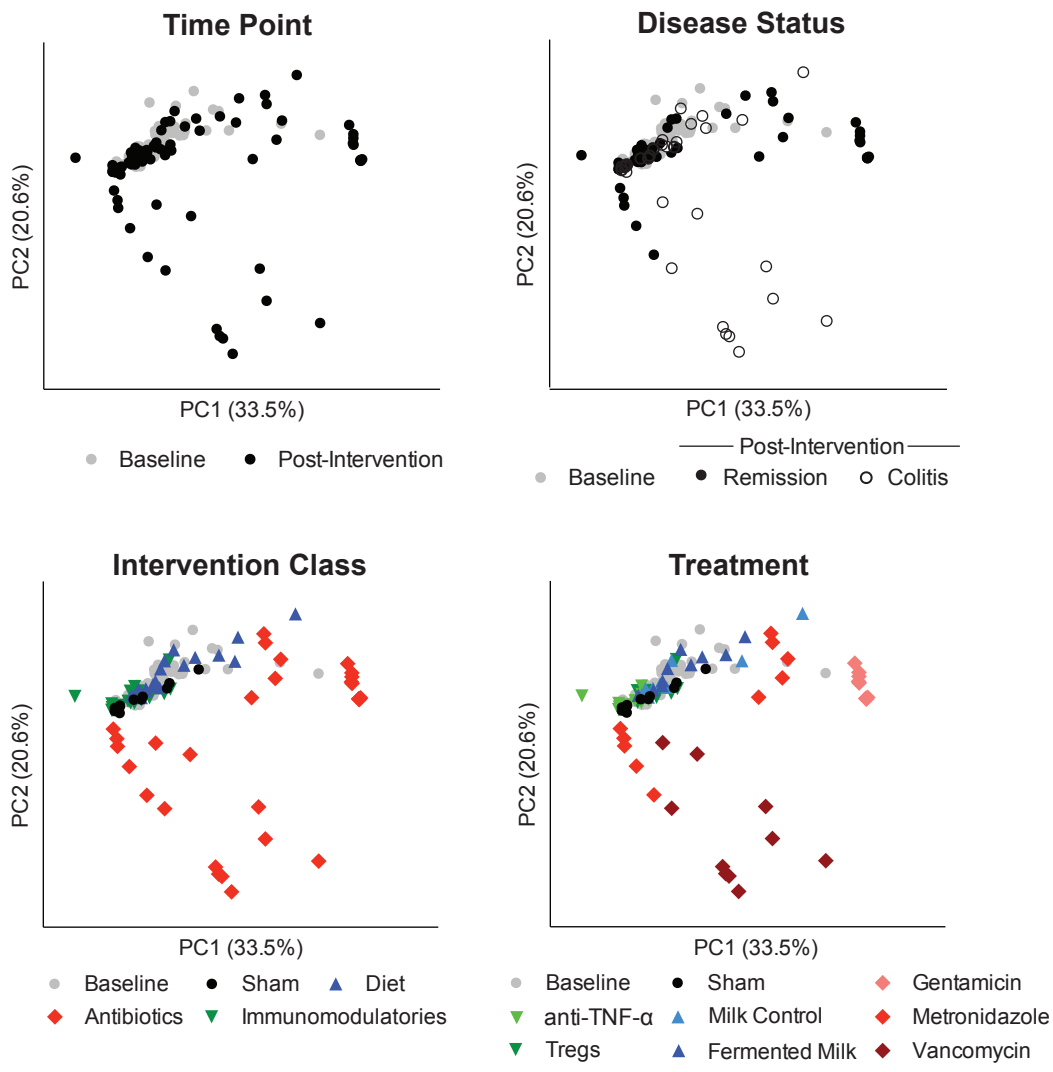

Supplement: ismej20143x5.pdf [file ismej20143x5.pdf]

**Figure S3**

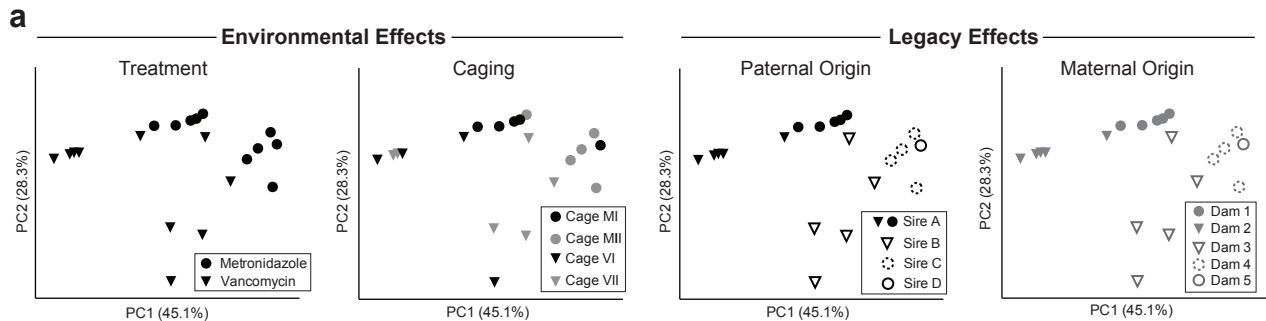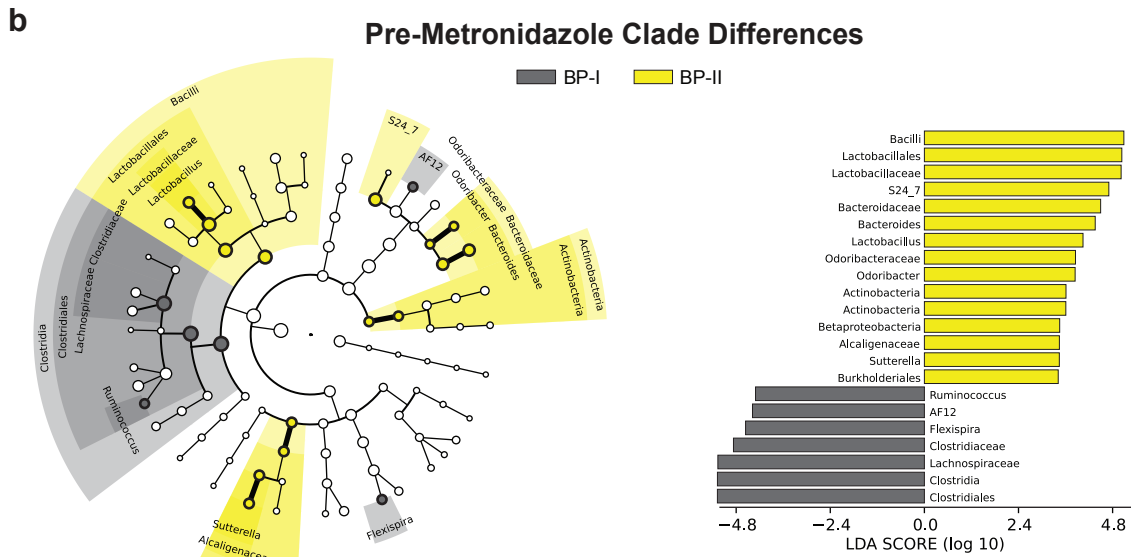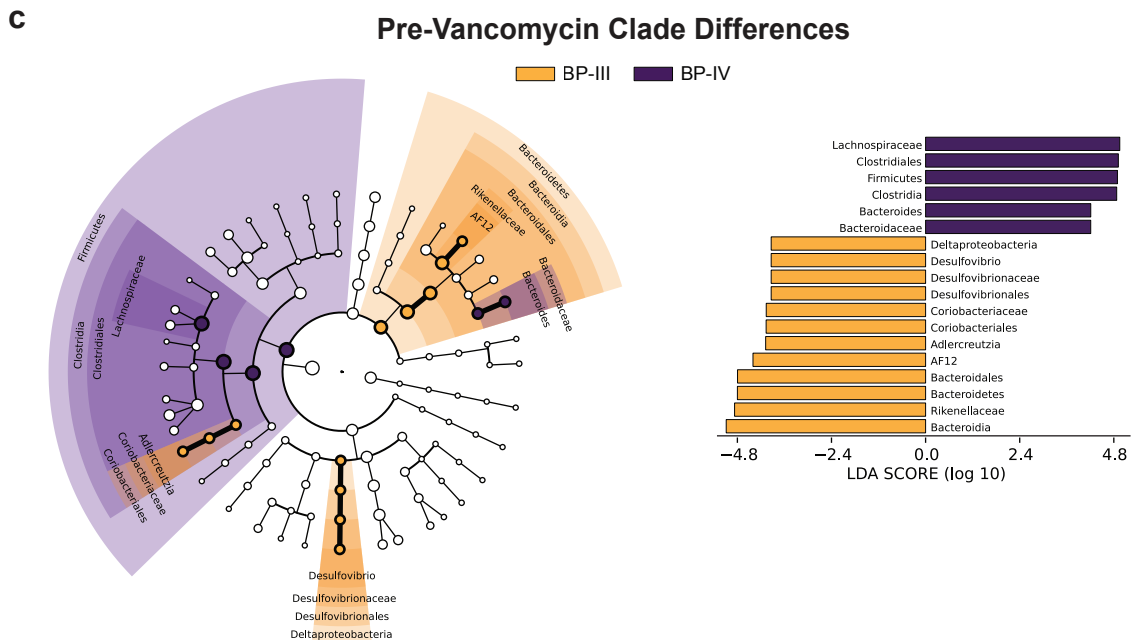

Supplement: ismej20143x6.pdf [file ismej20143x6.pdf]

**Figure S6**

**a**

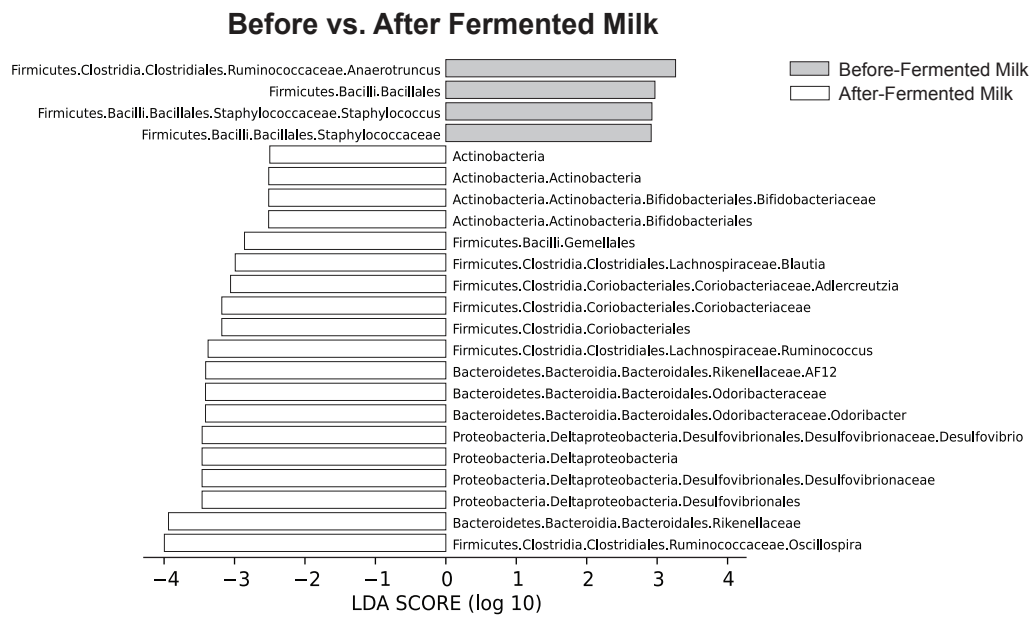

**b**

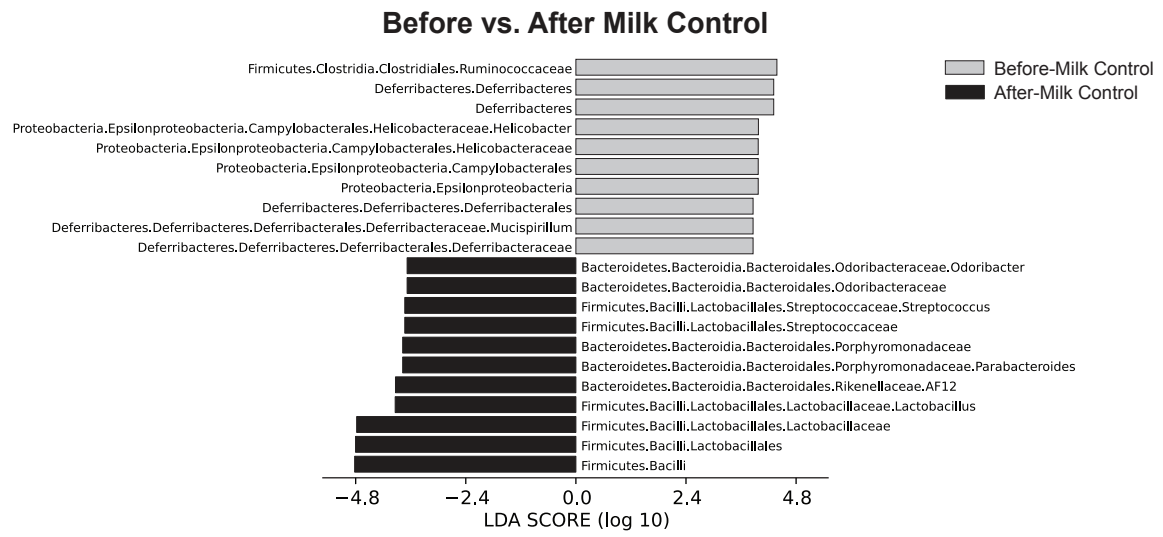

**c**

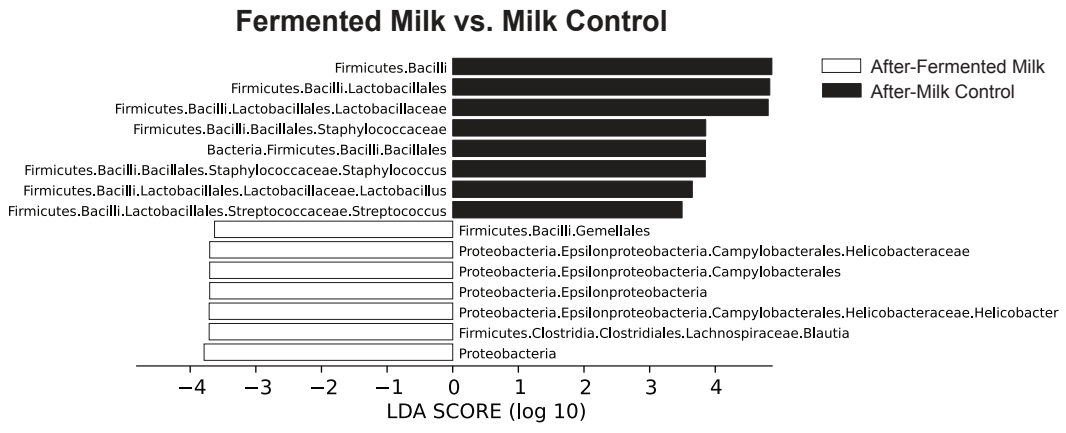

Supplement: ismej20143x9.pdf [file ismej20143x9.pdf]
